# Supplementary material
Source: ML conference proceedings conference paper supplement (https://proceedings.neurips.cc/paper_files/paper/2017/hash/cdd96eedd7f695f4d61802f8105ba2b0-Abstract.html)
Supplement: Supplementary file [file cdd96eedd7f695f4d61802f8105ba2b0-Supplemental.zip]

---

# PRUNE: Preserving Proximity and Global Ranking for Network Embedding (Supplementary Material)

---

**Yi-An Lai** <sup>\*‡</sup>

National Taiwan University  
b99202031@ntu.edu.tw

**Chin-Chi Hsu** <sup>‡†</sup>

Academia Sinica  
chinchii@iis.sinica.edu.tw

**Wen-Hao Chen** <sup>\*</sup>

National Taiwan University  
b02902023@ntu.edu.tw

**Mi-Yen Yeh** <sup>†</sup>

Academia Sinica  
miyen@iis.sinica.edu.tw

**Shou-De Lin** <sup>\*</sup>

National Taiwan University  
sdlin@csie.ntu.edu.tw

## 1 Notation introduction

Table 1: Commonly used notations

| Notation                                  | Description                                           |
|-------------------------------------------|-------------------------------------------------------|
| $G = (V, E)$                              | Input directed network (or graph)                     |
| $\mathbf{A} \in \{0, 1\}^{N \times N}$    | Adjacency matrix of network $G$                       |
| $V$                                       | Set of nodes or vertices                              |
| $E = \{(i, j) : a_{ij} = 1\}$             | Set of links or edges                                 |
| $N =  V $                                 | Number of nodes in network $G$                        |
| $M =  E $                                 | Number of links in network $G$                        |
| $P_i$                                     | Set of direct predecessors of node $i$                |
| $S_i$                                     | Set of direct successors of node $i$                  |
| $m_i =  P_i $                             | In-degree of node $i$                                 |
| $n_i =  S_i $                             | Out-degree of node $i$                                |
| $\mathbf{z}_i \in [0, \infty)^D$          | Latent $D$ -community distribution vector of node $i$ |
| $\mathbf{W} \in [0, \infty)^{D \times D}$ | Shared matrix of community interactions               |
| $\pi_i \geq 0$                            | Global ranking score of node $i$                      |

---

<sup>\*</sup>Department of Computer Science and Information Engineering

<sup>†</sup>Institute of Information Science

<sup>‡</sup>These authors contributed equally to this paper.

## 2 Proof for the closed-form solution of binary classification

The objective function of our binary classification is shown below:

$$\begin{aligned}
& \arg \max_{\mathbf{z}, \mathbf{W}} \mathbb{E}_{(i,j) \in E} [\log \sigma(\mathbf{z}_i^\top \mathbf{W} \mathbf{z}_j)] + \alpha \mathbb{E}_{(i,j) \in F} [\log (1 - \sigma(\mathbf{z}_i^\top \mathbf{W} \mathbf{z}_k))] \\
&= \mathbb{E}_i \mathbb{E}_{j \in S_i} [\log \sigma(\mathbf{z}_i^\top \mathbf{W} \mathbf{z}_j)] + \alpha \mathbb{E}_i \mathbb{E}_k [\log (1 - \sigma(\mathbf{z}_i^\top \mathbf{W} \mathbf{z}_k))] \\
&= \sum_{i \in V} \sum_{j \in S_i} p_s(i) p_t(j|i) \log \sigma(\mathbf{z}_i^\top \mathbf{W} \mathbf{z}_j) + \alpha \sum_{i \in V} \sum_{k \in V} p_s(i) p_t(k) \log (1 - \sigma(\mathbf{z}_i^\top \mathbf{W} \mathbf{z}_k)) \\
&= \sum_{i \in V} \sum_{j \in S_i} \frac{n_i}{M} \frac{1}{n_i} \log \sigma(\mathbf{z}_i^\top \mathbf{W} \mathbf{z}_j) + \alpha \sum_{i \in V} \sum_{k \in V} \frac{n_i}{M} \frac{m_k}{M} \log (1 - \sigma(\mathbf{z}_i^\top \mathbf{W} \mathbf{z}_k)).
\end{aligned}$$

Given source node  $i$ , one of linked target node  $j \in S_i$  enjoys a conditional distribution proportional to  $\frac{1}{n_i}$ . Since  $S_i \subseteq V$  implies  $k$  including  $j$ , for specific positive example  $(i, j)$ , we have:

$$\arg \max L_{ij} = \frac{1}{M} \log \sigma(\mathbf{z}_i^\top \mathbf{W} \mathbf{z}_j) + \alpha \frac{n_i}{M} \frac{m_j}{M} \log (1 - \sigma(\mathbf{z}_i^\top \mathbf{W} \mathbf{z}_j)).$$

Now let  $y_{ij} = \mathbf{z}_i^\top \mathbf{W} \mathbf{z}_j$ . We first derive the closed-form solution of zero first-order derivative over  $\sigma(y_{ij})$ :

$$\begin{aligned}
\frac{\partial L_{ij}}{\partial \sigma(y_{ij})} &= \frac{1}{M} \frac{1}{\sigma(y_{ij})} - \alpha \frac{n_i}{M} \frac{m_j}{M} \frac{1}{1 - \sigma(y_{ij})} \\
&= 0 \\
\implies \sigma(y_{ij}) &= \frac{\frac{1}{M}}{\frac{1}{M} + \alpha \frac{n_i}{M} \frac{m_j}{M}} \\
&= \frac{M}{M + \alpha n_i m_j}.
\end{aligned}$$

Next We obtain  $y_{ij}$  after calculations:

$$\begin{aligned}
\frac{1}{1 + e^{-y_{ij}}} &= \frac{M}{M + \alpha n_i m_j} \\
\implies y_{ij} &= \log \frac{M}{\alpha n_i m_j} \\
&= \log \frac{\frac{1}{M}}{\alpha \frac{n_i}{M} \frac{m_j}{M}} \\
&= \log \frac{p_{s,t}(i, j)}{p_s(i) p_t(j)} - \log \alpha.
\end{aligned}$$

## 3 Proof for matrix tri-factorization supporting the second-order proximity

The second-order proximity implies high similarity between two representation vectors  $\mathbf{z}_i, \mathbf{z}_j$  if nodes  $i, j$  have similar sets of direct predecessors or direct successors.

Consider the non-missing entries of the  $i$ -th and  $j$ -th column  $\mathbf{a}_i^{\text{PMI}}, \mathbf{a}_j^{\text{PMI}}$  in our derived PMI matrix  $\mathbf{A}^{\text{PMI}}$ . Since all the non-missing entries are in link set  $E$ , the two columns represent the sets of direct predecessors of node  $i$  and  $j$  where the links are weighted by PMI. Based on our matrix tri-factorization  $\mathbf{Z}^\top \mathbf{W} \mathbf{Z} \approx \mathbf{A}^{\text{PMI}}$ , we have:

$$\begin{aligned}
\mathbf{a}_i^{\text{PMI}} &\approx \mathbf{Z}^\top \mathbf{W} \mathbf{z}_i, \\
\mathbf{a}_j^{\text{PMI}} &\approx \mathbf{Z}^\top \mathbf{W} \mathbf{z}_j
\end{aligned}$$

where  $\mathbf{z}_i$  is the  $i$ -th column of representation matrix  $\mathbf{Z}$ . As the predecessor sets are similar  $\mathbf{a}_i^{\text{PMI}} \approx \mathbf{a}_j^{\text{PMI}}$ , then their corresponding representation vector must be similar  $\mathbf{z}_i \approx \mathbf{z}_j$  due to the same weight matrix  $\mathbf{Z}^\top \mathbf{W}$ . Similarly, when modeling the matrix tri-factorization for the rows in  $\mathbf{A}^{\text{PMI}}$ , we also obtain  $\mathbf{z}_i \approx \mathbf{z}_j$  if nodes  $i, j$  have similar successor sets.

## 4 Proof for the expectation of community interactions

Let  $\mathbf{W} \in [0, \infty)^{D \times D}$  be the community interaction matrix where each entry  $w_{cd}$  denotes the expected number of interactions from community  $c$  to  $d$ .  $c = d$  implies the number of internal interactions within a community. We assume that the existence of link  $(i, j)$  is determined by the expected value of  $\mathbf{W}$  with community distributions of  $i$  and  $j$ :

$$\mathbb{E}_{(i,j)}[\mathbf{W}] = \sum_{c=1}^D \sum_{d=1}^D \Pr(i \in C_c, j \in C_d) w_{cd}$$

where  $C_c$  is the set of nodes in community  $c$ . Let  $\mathbf{z}_i$  be an unnormalized distribution vector where each dimension  $0 \leq z_{ic} \propto \Pr(i \in C_c)$ . Under the independence assumption between  $\Pr(i \in C_c)$  and  $\Pr(j \in C_d)$ , we have:

$$\begin{aligned} \sum_{c=1}^D \sum_{d=1}^D \Pr(i \in C_c, j \in C_d) w_{cd} &= \sum_{c=1}^D \sum_{d=1}^D \Pr(i \in C_c) \Pr(j \in C_d) w_{cd} \\ &\propto \sum_{c=1}^D \sum_{d=1}^D z_{ic} z_{jd} w_{cd} \\ &= \mathbf{z}_i^\top \mathbf{W} \mathbf{z}_j. \end{aligned}$$

## 5 Proof for community interactions following Poisson distribution

Based on the proof in the previous section, for specific link  $(i, j)$ , the expected number of interactions from community  $c$  to  $d$  is

$$\Pr(i \in C_c) \Pr(j \in C_d) w_{cd} \propto z_{ic} z_{jd} w_{cd}.$$

Here we model discrete random variable  $X_{cd}^{(i,j)}$  as the number of interactions from community  $c$  to  $d$  for link  $(i, j)$ , following Poisson distribution  $X_{cd}^{(i,j)} \sim \mathcal{P}(\mu = z_{ic} z_{jd} w_{cd})$ . Using the properties of Poisson distribution, the overall number of interactions among community pairs is

$$X^{(i,j)} = \sum_{c=1}^D \sum_{d=1}^D X_{cd}^{(i,j)} \sim \mathcal{P}\left(\mu = \sum_{c=1}^D \sum_{d=1}^D z_{ic} z_{jd} w_{cd} = \mathbf{z}_i^\top \mathbf{W} \mathbf{z}_j\right).$$

Assume that node  $i$  and  $j$  belong to at least one community. Link  $(i, j)$  exists due to at least one interaction between the communities that  $i$  and  $j$  belong to, which is

$$\mathcal{P}(X^{(i,j)} > 0) = 1 - \mathcal{P}(X^{(i,j)} = 0) = 1 - \exp(-\mathbf{z}_i^\top \mathbf{W} \mathbf{z}_j).$$

## 6 Proof for PageRank upper-bound objective function

Let  $P_j$  be the set of direct predecessors of node  $j$ , and  $n_i$  be the out-degree of node  $i$ . Then we have:

$$\begin{aligned}
\arg \min_{\pi} \sum_{j \in V} \left( \sum_{i \in P_j} \frac{\pi_i}{n_i} - \pi_j \right)^2 &= \sum_{j \in V} \left( \left( \sum_{i \in P_j} \frac{\pi_i}{n_i} \right)^2 - 2\pi_j \sum_{i \in P_j} \frac{\pi_i}{n_i} + \pi_j^2 \right) \\
&\leq \sum_{j \in V} \left( \underbrace{\left( \sum_{i \in P_j} 1^2 \right) \left( \sum_{i \in P_j} \left( \frac{\pi_i}{n_i} \right)^2 \right)}_{\text{Cauchy-Schwarz inequality}} - 2\pi_j \sum_{i \in P_j} \frac{\pi_i}{n_i} + \pi_j^2 \right) \\
&= \sum_{j \in V} \sum_{i \in P_j} \left( m_j \left( \frac{\pi_i}{n_i} \right)^2 - 2\pi_j \frac{\pi_i}{n_i} + \frac{1}{m_j} \pi_j^2 \right) \\
&= \sum_{\substack{(i,j) \in E \\ =j \in V, i \in P_j}} m_j \left( \left( \frac{\pi_i}{n_i} \right)^2 - 2\frac{\pi_j \pi_i}{m_j n_i} + \left( \frac{\pi_j}{m_j} \right)^2 \right) \\
&= \sum_{(i,j) \in E} m_j \left( \frac{\pi_i}{n_i} - \frac{\pi_j}{m_j} \right)^2.
\end{aligned}$$

Since  $\left( \sum_{i \in P_j} 1^2 \right) \left( \sum_{i \in P_j} \left( \frac{\pi_i}{n_i} \right)^2 \right) \geq 0$ , we constrain  $\pi_i \geq 0$  for all node  $i$  to make the upper bound tighter.

## 7 Proof for PageRank sufficient condition

For each node  $j \in V$ , let  $P_j$  be the set of direct predecessors of node  $j$ . We denote node  $i \in P_j$ . Then for each node  $j$ , we show a sufficient condition:

$$\frac{\pi_i}{n_i} = \frac{\pi_j}{m_j} \quad \forall \quad i \in P_j, j \in V \quad \underbrace{=}_{(i,j) \in E}$$

where  $m_j = |P_j|$ ,  $n_i$  is respectively the in-degree of node  $j$  and the out-degree of node  $i$ . Now we calculate the sum of the left-hand-side for all the direct predecessors  $i$  of each node  $j$ :

$$\begin{aligned}
\sum_{i \in P_j} \frac{\pi_i}{n_i} &= \sum_{i \in P_j} \frac{\pi_j}{m_j} \\
&= \frac{1}{m_j} \sum_{i \in P_j} \pi_j \\
&= \frac{1}{m_j} m_j \pi_j \\
&= \pi_j \quad \forall j \in V.
\end{aligned}$$

The equation is just the PageRank assumption:  $\sum_{i \in P_j} \frac{\pi_i}{n_i} = \pi_j \quad \forall j \in V$  (here we omit the damping factor).
